1 **Homoploid hybridization signals due to ancestral subdivision: a case**  
2 **study on the D lineage in wheat**

3

4 Yunfeng Jiang<sup>1,2,#</sup>, Zhongwei Yuan<sup>1,2,#</sup>, Haiyan Hu<sup>2,3</sup>, Xueling Ye<sup>1,2</sup>, Zhi  
5 Zheng<sup>2</sup>, Yuming Wei<sup>1</sup>, You-Liang Zheng<sup>1</sup>, You-Gan Wang<sup>4,\*</sup>, Chunji Liu<sup>2,\*</sup>

6

7 <sup>1</sup>Triticeae Research Institute, Sichuan Agricultural University, Wenjiang,  
8 Chengdu 611130, China

9 <sup>2</sup>CSIRO Agriculture and Food, St Lucia, Queensland 4067, Australia

10 <sup>3</sup>College of Life Science and Technology, Henan Institute of Science and  
11 Technology, Xinxiang, Henan 453003, China

12 <sup>4</sup>Science and Engineering Facility, Queensland University of Technology,  
13 Brisbane, QLD 4000

14 #These authors contributed equally to this publication.

15 \*Corresponding authors, emails you-gan.wang@qut.edu.au;  
16 Chunji.liu@csiro.au

17

18

19 **Abstract**

20 Homoploid hybrid speciation has been reported in a wide range of species since the  
21 exploitation of genome sequences in evolutionary studies. However, the interference  
22 of ancestral subdivision has not been adequately considered in many such  
23 investigations. Using the D lineage in wheat as an example, we showed clearly that  
24 ancestral subdivision has led to false detection of homoploid hybridization signals.  
25 We develop a novel statistical framework by examining the changes in shared  
26 ancestral variations and infer on the likelihood of speciation due to genuine  
27 homoploid hybridization or ancestral subdivisions. Applying this to wheat data, we  
28 found that homoploid hybridization was not involved in the origin of the D lineage  
29 contrary to the now widely held belief. This example indicates that the significance of  
30 homoploid hybrid speciation is likely exaggerated. The underlying methodology  
31 developed in this study should be valuable for clarifying whether homoploid  
32 hybridization has contributed to the speciation of many other species.

33

34 **Keywords:** ancestral subdivision; ancestral variations; homoploid hybrid speciation;  
35 *Triticum-Aegilops*

## 36 Introduction

37 Homoploid hybrid speciation (HHS) is the process of forming a new species between  
38 two donor species without a change in chromosome numbers. Such events have  
39 historically been considered rare, but this view has dramatically changed in recent  
40 years. Since the exploitation of sequences in evolutionary investigations, the  
41 involvement of homoploid hybridization (HH) has been proposed for the evolution  
42 and speciation of a wide range of species, including both plants and animals (Mallet  
43 2007; Abbott et al. 2013; Sousa and Hey 2013; Payseur and Rieseberg 2016; Taylor  
44 and Larson 2019). However, the majority of the reported cases of HHS have been  
45 deduced from the analysis of sequence data only, while crucial evidence in support  
46 of such claims remains missing (Schumer et al. 2014). Accounts on the origins of the  
47 various progenitors of bread wheat (*Triticum aestivum* L.) serve as a typical example.

48

49 Bread wheat is an allohexaploid with three subgenomes ( $2n=6x=42$ ; genome  
50 AABBDD). The three subgenomes are derived from three different diploid lineages  
51 ( $2x=2n=14$ ): *Triticum urartu* (AA) (Dvorak et al. 1993), a close relative of *Aegilops*  
52 *speltoides* (BB) (Dvorak and Zhang 1990), and *Aegilops tauschii* (DD) (McFadden and  
53 Sears 1946). The phylogenetic histories of these diploid lineages have become the  
54 subject of controversy in recent years. Based on an analysis of genomic sequences,  
55 Marcussen et al. (2014) and Sandve et al. (2015) proposed the tantalising scenario  
56 that the ancestral D lineage originated from HH between ancient A and B lineages.  
57 By re-analysing data used by Marcussen et al. (2014) and chloroplast sequences  
58 from eight diploid and four polyploid wheat species in the *Triticum-Aegilops* complex,  
59 Li et al. (2015a, 2015b) argued for a more complex hybrid origin of the D lineage.  
60 Based on analyses of the evolutionary dynamics of transposon elements and  
61 mutations, El Baidouri et al. (2017) also reached the conclusion that the D lineage  
62 was derived from a complex history of multiple rounds of HH between ancient A and  
63 S (progenitor of the B subgenome) lineages as well as other relatives. Based on the  
64 analysis of transcriptome data, Glemin et al. (2018) concluded that pervasive HH

65 events were involved in the evolution of these diploid wheat lineages, and that most  
66 of those belonging to the D lineage were derived from HHS between the A and B  
67 lineages.

68

69 To accommodate the discordant results obtained from the different studies, models  
70 for the evolution of the D lineage have become increasingly complicated. However,  
71 none of these models are strongly supported by biological evidence. First, the  
72 prohibitive genetic distances among the three diploid lineages of wheat known today  
73 make the prospects of producing any fertile diploid progeny between them unlikely.  
74 Even with modern techniques, it has not been possible to generate any viable diploid  
75 between the extant diploid A and D lineages, let alone between the more distant A  
76 and B lineages. Second, different chromosomal structures between these diploid  
77 lineages would have prevented the generation of fertile diploid hybrids between  
78 them. A large reciprocal translocation between chromosome arms 4AL and 5AL (Ma  
79 et al. 2013) exists in all extant species of the A lineage, including both *T. urartu* (King  
80 et al. 1994) and *T. monococcum* (Devos et al. 1995), but not in any species  
81 belonging to either the diploid B or D lineage. This translocation, if present prior to  
82 the assumed hybridization event(s) leading to the formation of the diploid D lineage,  
83 would make the production of any fertile diploid between the A and B lineages  
84 impossible. Third, restricted chromosomal recombination would be expected in  
85 hybrids involving distantly related genotypes (Ungerer et al. 1998; Buerkle et al.  
86 2007) as well as genotypes with different chromosomal structures (Barb et al. 2014).  
87 However, large parental blocks from either the A or B genome were not detected on  
88 any of the D chromosomes (Marcussen et al. 2014; Glemin et al. 2018). Restricted  
89 recombination does not even exist in either of the chromosomal segments  
90 corresponding to the relative 4/5 translocation (supplementary fig.1).

91

92 The key evidence used in arguing for HHS of the D lineage is that, based on shared  
93 variations (gene trees, gene content, transposon elements (TE) and single nucleotide

94 polymorphism (SNP)), the A and B lineages are more closely related to D individually  
95 than to each other (Marcussen et al. 2014; El Baidouri et al. 2017; Glemin et al.  
96 2018 ). It is believed that, under the condition of random mating, shared variations  
97 concordant with the species tree should have the highest probability, while the other  
98 two discordant with the species tree should be equal in a bifurcating speciation. Any  
99 discrepancy with the above was accounted for by the involvement of HH (Hudson  
100 1983; Tajima 1983). It is well known, however, that population subdivision occurs due  
101 to barriers such as geography or ecology (Slatkin and Pollack 2008), and that  
102 ancestral subdivision could lead to asymmetry in gene trees, resulting in the  
103 detection of false HH signals among descendant species based on many existing  
104 methods (Eriksson and Manica 2012; Eriksson and Manica 2014). Thus, the  
105 available results cannot rule out the possibility that the detected HH signals for the  
106 diploid wheat lineages could in fact be due to ancestral subdivision. The issue of how  
107 to distinguish between genuine HH and ancestral subdivision has been hotly debated  
108 in recent years (Durand et al. 2011; Eriksson and Manica 2012; Sankararaman et al.  
109 2012; Yang et al. 2012; Eriksson and Manica 2014; Theunert and Slatkin 2017), and  
110 it remains very challenging. By developing and applying a new approach for  
111 detecting genuine HH, we re-evaluated whether the A and B lineages were indeed  
112 involved in the origin of the D lineage.

113

## 114 **Results and discussion**

115 Three possible types of shared variations can be obtained from three different taxa  
116 (fig. 1A). Based on the times at which they occurred, shared variations can be placed  
117 into two classes. The first class are ancestral variations (AVs) which occurred before  
118 the differentiation of the earliest taxa among those under investigation. This class of  
119 variations can be grouped into three possible types under incomplete lineage sorting  
120 (ILS) (fig. 1A). Ancestral subdivision can lead to the unexpected distribution of AVs.  
121 The second class are variations which occurred between the differentiation of the first  
122 and last taxa under investigation. These variations reflect genuine evolutionary

123 relationships, and they are thus termed phylogenetically informative variations (PIVs).  
124 The distribution patterns of PIVs should vary depending on whether HH was involved  
125 in the speciation of a given taxon (fig. 1A). Using the three diploid lineages of bread  
126 wheat as an example: If HH between the A and B lineages was not involved in the  
127 origin of the D lineage (the B(A,D) model), then PIVs should only be found in the  
128 shared variations between A and D (AD type). When a single event of HH was  
129 involved (the A(D)B model), PIVs should be present in both the AD and BD types (fig.  
130 1A). Thus, differences in the patterns of PIV distribution can be reliably used to  
131 detect HH signals irrespective of whether ancestral subdivision was involved in the  
132 evolution of a given taxon.

133

134 Clearly, knowing the time at which a given variation occurred is the key to accurately  
135 identifying PIVs, but determining such times can be difficult. However, it should be  
136 possible to identify a proportion of AVs by introducing a suitable species as an  
137 outgroup. If the outgroup was differentiated earlier than any of the taxa under study,  
138 then shared variations among them should already exist in their common ancestor  
139 (fig. 1B). In other words, such variations should all belong to AVs. If the outgroup has  
140 a similar genomic relatedness to each of the taxa under investigation, then it would  
141 be possible to estimate the distribution of AVs. Thus, it should be feasible to deduce  
142 the PIV components based on AVs and use the information to detect genuine HH  
143 signals (fig. 1C and fig. 2A).

144

145 We assessed rye (R genome) as an outgroup to identify AVs for the three diploid  
146 wheat lineages. Rye diverged earlier (about 4.5 MY) than the diploid wheat lineages  
147 (Huang et al. 2002; Gornicki et al. 2014), and the genomic relatedness between it  
148 and the three wheat lineages was similar (supplementary fig. 2 and supplementary  
149 table 1). These characteristics indicate that the distribution of AVs among the three  
150 diploid wheat lineages can be estimated based on their presence or absence in rye  
151 (supplementary fig. 3).

152

153 We thus conducted an analysis based on shared Indels in 3,771 orthologous genes  
154 identified from the three diploid wheat lineages: A lineage, including the A  
155 subgenome of bread wheat (genome A) and *T. uratu* (genome A<sup>u</sup>); B lineage,  
156 including the B subgenome (B) and *Ae. speltoides* (B<sup>sp</sup>); and D lineage, including the  
157 D subgenome(D), *Ae. tauschii* (D<sup>ta</sup>) and *Ae. sharonensis* (D<sup>sh</sup>). Different  
158 combinations of the three lineages yield a total of six different datasets, including  
159 ABD, A<sup>u</sup>B<sup>sp</sup>D<sup>ta</sup>, combined(ABD+A<sup>u</sup>B<sup>sp</sup>D<sup>ta</sup>), ABD<sup>sh</sup>, A<sup>u</sup>B<sup>sp</sup>D<sup>sh</sup> and  
160 combined(ABD<sup>sh</sup>+A<sup>u</sup>B<sup>sp</sup>D<sup>sh</sup>) (supplementary table 2). Initially, shared Indels in the  
161 different datasets were identified using barley to infer their ancestral states. This  
162 analysis detected 881, 711, 592, 730, 645 and 514 shared Indels, respectively, from  
163 each of the datasets. Similar to data reported earlier (Marcussen et al. 2014; El  
164 Baidouri et al. 2017), these original data suggest that the A and B lineages are more  
165 closely related individually to D than to each other, and that BD is closer than AD in  
166 most of the combinations (except for ABD) (fig. 2b and supplementary table 2). A  
167 KKSC insertion significance test (Kuritzin et al. 2016) against these data strongly ( $p <$   
168 0.01) suggested HHS of the D lineage from A and B based on each of the datasets  
169 (fig. 2b and supplementary table 3). However, as mentioned earlier, using such data  
170 cannot eliminate the interference of ancestral subdivisions.

171

172 We then used the R genome to identify AVs from each of these datasets. This  
173 analysis found that the proportions of ABR in AB and BDR in BD are very similar.  
174 However, the proportion of ADR in AD is significantly lower than the other two types  
175 (fig. 2C and supplementary table 4). Clearly, the proportion of AVs from shared  
176 variations containing AVs should only be higher than those containing both AVs and  
177 PIVs (fig. 1C). Thus, strong signals of PIVs were present in the AD type but not in the  
178 BD type, which was expected from a non-HH model of B(A,D). To determine the  
179 distribution of PIVs, we simulated the effects of removing AVs from the original data  
180 based on the observed ratios of these variations until one of the three shared types

181 reached zero (fig. 2A). If the observed ratios are similar to the theoretical distribution  
182 of the AVs, then the removed part should predominantly originate from AVs, while the  
183 remainder should mainly contain PIVs. This method should thus provide a good  
184 estimate of the distribution of PIVs. Here, all datasets showed that the percentages of  
185 the AD type were very high (91%~99%) in the predicted distribution of PIVs (fig. 2D).  
186 However, few of the shared variations in the BD type were retained in most of the  
187 datasets (fig. 2D), indicating that they predominantly originated from AVs. Again,  
188 these results all support the non-HHS model of B(A,D) and are not what should be  
189 expected from the HHS model of A(D)B.

190

191 We then further estimated the optimal parameters for both the HHS and non-HHS  
192 models using the shared variations by maximising the multinomial log-likelihood. We  
193 tested which of the models could be accepted based on the discrepancy between the  
194 observed and expected data for each of them. The results showed that significant  
195 differences were not detected from the datasets for any of the combinations under  
196 the non-HHS model B(A,D) (fig. 3A and table 1). However, the HHS model A(D)B  
197 (with equal contributions of A and B) (Marcussen et al. 2014) was strongly rejected  
198 (fig. 3b and supplementary table 5). Further, the parameters from the non-HHS  
199 model B(A,D) provided a clear picture on how AVs led to the detection of false HH  
200 signals. High proportions of AVs (varying from 79% to 91%) were present in the  
201 original data, and their distributions did not meet the ratios of  $AD > AB = BD$ , as should  
202 be expected from ILS under random mating. Understandably, the interactions  
203 between the high proportion and unexpected distribution of AVs could easily obscure  
204 the effect of PIVs in the original data, resulting in the A and B lineages appearing to  
205 be more closely related to the D lineage individually than to each other.

206

207 In addition to shared variations, estimated divergence times (EDTs) based on nuclear  
208 genome sequences that contradict a treelike phylogeny for the three diploid lineages  
209 of bread wheat (fig. 4A) were also used as evidence to argue for the HHS of the D



210 lineage (Marcussen et al. 2014). However, it is known that AVs could lead to an  
211 overestimation of divergence times (Charlesworth 2010). EDTs for the three diploid  
212 lineages of bread wheat based on the nuclear genomes (Marcussen et al. 2014) are  
213 more than double those based on the chloroplast genomes (Gornicki et al. 2014) (fig.  
214 4A). The differences in the levels of overestimation among the three lineages based  
215 on the nuclear sequences can be explained by the different levels of AVs among  
216 them (fig. 4B). As the proportion of AVs in the BD type is much larger than that in the  
217 AB type (table 1), it is expected that the coalescent EDT(A-B) should be much higher  
218 than the coalescent EDT(B-D) based on the nuclear sequences (fig. 4B). Thus, the  
219 EDTs of the three lineages based on the nuclear genomes cannot be used as  
220 evidence to argue for the HHS of the D lineage. As chloroplast genomes are  
221 predominantly maternally inherited, variations in them should not be significantly  
222 affected by AVs. As a result, EDTs from the chloroplast sequences should be more  
223 reliable. Based on these understandings and the available results, we revised the  
224 model for the evolution of the three diploid lineages of bread wheat (fig. 5).

225

226 Using the three diploid lineages of bread wheat as an example, we demonstrated  
227 that the interference of ancestral subdivision could pose a huge problem in detecting  
228 genuine HH signals in speciation. The diploid D lineage of bread wheat is only one of  
229 the many taxa for which the possibility of HHS has been deduced from sequence  
230 data (Schumer et al. 2014). Although the possibility that HHS has played critical roles  
231 in the evolution of some species may exist, such possibility is now clearly excluded in  
232 the study of D lineage of wheat, we therefore believe that its importance has likely  
233 been exaggerated. The new approach discussed in this publication not only provides  
234 more meaningful results for the evolution of the D lineage of bread wheat but should  
235 also be invaluable in re-assessing other species for which HHS has been deduced  
236 based on sequence data.

237

238

## 239 **Materials and Methods**

### 240 **Genome sequences used in the study**

241 Multiple sets of genome sequences were used in this study. Genome sequences and  
242 gene models of bread wheat based on IWGSC RefSeq assembly v1.0 (IWGSC 2014)  
243 were downloaded from <http://www.wheatgenome.org/>. Genome sequences of  
244 *Triticum urartu* (AA) (Ling et al. 2013) and *Aegilops tauschii* (DD) (Jia et al. 2013)  
245 were downloaded from <http://plants.ensembl.org/>. The diploid species of B lineage  
246 (*Ae. speltoides* (SS)) and D lineage (*Ae. sharonensis*) were downloaded from  
247 <http://www.wheatgenome.org/>. The genome sequences and gene models of barley  
248 (*Hordeum vulgare* L; 2n=2x=14; genome HH) (Mascher et al. 2017) were obtained  
249 from <http://plants.ensembl.org/>. Rye (*Secale cereal*, genome RR) was used to  
250 identify ancestral variations in the diploid progenitors of bread wheat, and its genome  
251 sequences (Bauer et al. 2017) were downloaded from [http://webblast.ipk-](http://webblast.ipk-gatersleben.de/ryeselect/)  
252 [gatersleben.de/ryeselect/](http://webblast.ipk-gatersleben.de/ryeselect/).

253

### 254 **Genomic compositions of the D lineage of bread wheat based on orthologous** 255 **gene trees using the maximum likelihood method**

256 To investigate whether it originated from HHS (Marcussen et al. 2014) between the A  
257 and B lineages, genomic compositions of the D lineage from each of the putative  
258 parents were measured based on orthologous gene trees using the maximum  
259 likelihood method (Stamatakis 2014). Putative orthologous genes were identified  
260 from predicted proteins in barley and the three subgenomes using the PorthoMCL  
261 (Tabari and Su 2017) software with the default parameters.

262

263 The predicted coding sequences (CDS) from the putative orthologous genes in  
264 barley were then compared with those in the three subgenomes of bread wheat using  
265 BLASTn. Orthologous clusters were screened with a similarity > 85% for at least 50%  
266 of the lengths among them. Apart from the regions involved in the reciprocal  
267 translocation between chromosome arms 4AL and 5AL, only clusters containing

268 strictly four genes belonging to a single homoeologous group were considered as  
269 robust orthologous quadruplets (supplementary data 1). Chromosomal locations of  
270 4A/5B/5D/5H and 5A/4B/4D/4H were used to identify the regions corresponding to  
271 the translocation (supplementary data 2). CDS from the identified orthologous  
272 quadruplets were aligned using MAFFT (Kato and Standley 2013) with default  
273 parameters. They were used to reconstruct individual-gene maximum likelihood  
274 phylogenies using barley as the outgroup, with RAxML (Stanmatakis 2014) based on  
275 the GTRGAMMA substitution model. Bootstrap support was calculated from 200  
276 replicates. Phylogeny trees with bootstrap support of less than 50% were removed,  
277 and the remainder were further grouped to identify their origins. The CDS were then  
278 ordered according to their physical locations on the D subgenome of bread wheat. To  
279 measure approximate sizes of the parental blocks (Ungerer et al. 1998), physical  
280 sizes of consecutive genes of the same parentage were calculated (the distance  
281 spanned by all consecutive genes from the same parental species plus one-half of  
282 the distance to the nearest genes from the other species). Blocks at the ends of each  
283 group were not included because of the difficulty involved in determining their sizes.

284

### 285 **Genomic relationships between rye and the diploid progenitors of bread wheat**

286 Compared with barley, rye could be considered as a closer outgroup to determine the  
287 evolutionary relationships among the three diploid donors of bread wheat (Glemin et  
288 al. 2018). To assess this feasibility, we re-examined their relationships based on  
289 genome sequences. First, the genomic relatedness among the three diploid  
290 progenitors of bread wheat and rye was visualised with the rooted phylogenetic  
291 network based on the sequence data used by Marcussen et al. (2014). These data  
292 included the three subgenomes of bread wheat and the genomes of *T. uratu*, *T.*  
293 *monococcum*, *Ae. speltooides*, *Ae. tauschii*, *Ae. sharonensis* and *H. vulgare*. They  
294 were analysed against the CDS database of rye (Bauer et al. 2017). This analysis  
295 obtained 192 consensus sequences from the rye genome (supplementary data 3).  
296 The orthologous sequences were used to reconstruct individual-gene maximum

297 likelihood phylogenies with barley as the outgroup using the RAxML (Stamatakis  
298 2014) with the GTRGAMMA substitution model. Bootstrap support was calculated  
299 from 200 replicates. A Neighbour-Net was constructed from the average pairwise  
300 distances among the 192 gene trees using SplitTree 4 (Huson 1998). Second, the  
301 genomic relatedness among the three diploid donors of bread wheat and rye were  
302 further assessed using shared single nucleotide polymorphisms (SNPs). This  
303 assessment was based on 1,614 orthologous genes identified from the  
304 homoeologous CDS among the genomes of rye, barley and the three subgenomes of  
305 bread wheat (supplementary data 4). The predicted CDS of the five orthologous  
306 quintuplets were aligned using MAFFT (Katoh et al. 2013) with default parameters.  
307 SNPs were automatically detected using SNP-sites (Page et al. 2016). Indels were  
308 eliminated to avoid differences caused by different transcripts. Four different  
309 datasets, including A/B/R, A/D/R, B/D/R and A/B/D, were analysed, and the ancestral  
310 states were inferred based on the barley genome sequences. Only variations that  
311 split the four taxa into two groups of two were considered so that three types of  
312 shared variations could be obtained. For example, the three types of shared  
313 variations for the A/B/R dataset are AB, AR and BR types.

314

### 315 **Identification of shared Indels**

316 Indels have previously been widely utilised to assess evolutionary relationships. We  
317 focused only on those Indels from genes which could be found from each of the three  
318 subgenomes of bread wheat and from the genome of barley in this study. A total of  
319 3,771 such genes (orthologous quadruplets) were found (supplementary data 1) and  
320 used for further analyses. Sequences of the orthologous genes for the three  
321 subgenomes of bread wheat (ABD) were extracted from the wheat genome based on  
322 their locations from the gene models (IWGSC 2014). Their orthologous sequences in  
323 *T. urartu* (A<sup>u</sup>), *Ae. speltoides* (B<sup>sp</sup>), *Ae. tauschii* (D<sup>ta</sup>) and *Ae. sharonensis* (D<sup>sh</sup>) were  
324 identified based on BLAST analysis against the sequences of barley. Initially, four  
325 different datasets from different combinations of these genomes were obtained.

326 These included ABD, A<sup>u</sup>B<sup>sp</sup>D<sup>ta</sup>, ABD<sup>sh</sup> and A<sup>u</sup>B<sup>sp</sup>D<sup>sh</sup>. These quadruplets of  
327 orthologous genes were aligned using MAFFT with default parameters. Putative  
328 Indels with lengths of  $\geq 5$  bp were screened using RELINDEL (Ashkenazy et al.  
329 2014) with default parameters. Further, three types of the shared Indels were  
330 manually detected based on the following rules. Briefly, the presence or absence of  
331 an Indel in the outgroup (barley) was treated as the ancestral state (as 0), and the  
332 alternative was treated as the mutated state (as 1). Considering the order of H|A|B|D,  
333 we have 0|1|1|0 for AB shared Indels, 0|1|0|1 for AD shared Indels, and 0|0|1|1 for BD  
334 shared Indels.

335

336 When multiple Indels were present in a single gene, those with the same sequence  
337 were recorded only once. To decrease sampling bias from a single dataset, two  
338 combined datasets were generated from the common variations shared by  
339 ABD+A<sup>u</sup>B<sup>sp</sup>D<sup>ta</sup> and ABD<sup>sh</sup>+A<sup>u</sup>B<sup>sp</sup>D<sup>sh</sup>. Thus, subsequent analyses were performed using  
340 a total of six different datasets of shared variations (including ABD, A<sup>u</sup>B<sup>sp</sup>D<sup>ta</sup>, ABD<sup>sh</sup>,  
341 A<sup>u</sup>B<sup>sp</sup>D<sup>sh</sup>, combined ABD+A<sup>u</sup>B<sup>sp</sup>D<sup>ta</sup> and combined ABD<sup>sh</sup>+A<sup>u</sup>B<sup>sp</sup>D<sup>sh</sup>). A KKSC insertion  
342 significance test (Kuritzin et al. 2016) was conducted against these variations.

343

344 The shared Indels were then put into two groups based on their presence or absence  
345 in the rye genome. For those present in R, we have 0|1|1|1|0 (in the order of  
346 H|R|A|B|D) for ABR shared Indels, 0|1|1|0|1 for ADR shared Indels, and 0|1|0|1|1 for  
347 BDR shared Indels. For those absent in R, we have 0|0|1|1|0 for AB~ shared Indels,  
348 0|0|1|0|1 for AD~ shared Indels, and 0|0|0|1|1 for BD~ shared Indels. These data are  
349 listed in supplementary data 5.

350

### 351 **Distinguishing homoploid hybridization and ancestral subdivision from shared** 352 **variations**

353 Shared variations could be divided into two classes based on the times at which they  
354 occurred: (1) Ancestral variations (AVs), which occurred before the differentiation of

355 the earliest species under investigation; and (2) phylogenetically informative  
356 variations (PIVs), which occurred between the differentiation of the first and last  
357 species of concern. With three taxa, there are three possible patterns of shared  
358 variations from AVs under ILS. However, the patterns of PIV distributions should  
359 differ depending on whether HH was involved. Thus, PIVs can be unambiguously  
360 used to reconstruct evolutionary relationships. However, it is difficult to precisely  
361 identify PIVs from the mix due to the difficulty involved in determining the precise  
362 time at which a given variation occurred. Here, we propose an alternative approach  
363 which, by estimating the distribution of AVs, allows the indirect detection of PIVs.

364 **The distribution of AVs:** Suppose the total number of shared variations consisting  
365 of two classes, AVs and PIVs, we have  $p_{AV} + p_{PIV} = 1$ . As AVs are distributed among  
366 AB, AD and BD, we have  $p_{AV} = p_{AV(AD)} + p_{AV(BD)} + p_{AV(AB)}$ . With the use of a suitable  
367 outgroup, we can estimate the probability of AV distribution. The outgroup must  
368 satisfy the following three criteria: (1) it diverged earlier than any of the diploid  
369 lineages of bread wheat from a common ancestor but is close enough and shares a  
370 proportion of AVs with them; (2) gene flows between the outgroup and the taxa under  
371 investigation have not occurred. Thus, shared variations between it and the targeted  
372 taxa should be predominantly derived from AVs; and (3) the outgroup has similar  
373 genomic relatedness to the taxa under investigation. In other words, inherited AVs by  
374 the outgroup should not be biased towards any one of them. Rye seems to be a  
375 suitable candidate as the outgroup for the diploid lineages of bread wheat, as it  
376 satisfies these criteria (supplementary fig. 2 and supplementary table 1). Based on  
377 whether they are present in rye, we can obtain a dataset containing AVs only. This  
378 dataset includes all shared variations present in ADR, BDR and ABR.

379 Understandably, due to incomplete lineage sorting (ILS), a proportion of the AVs  
380 occurring prior to the divergence of rye ( $AVs^{\text{before R}}$ ) would show ancestral states in  
381 the R genome. Thus, not all  $AVs^{\text{before R}}$  could be detected using rye as the outgroup.  
382 Supposing that  $\omega$  is the proportion of  $AVs^{\text{before R}}$  in all AVs, then the probability of AD,  
383 BD and AB types derived from  $AVs^{\text{before R}}$  could be represented as  $\omega p_{AV(AD)}$ ,  $\omega p_{AV(BD)}$

384 and  $\omega p_{AV(AB)}$ , respectively. Supposing that  $\gamma_1, \gamma_2$  and  $\gamma_3$  are the proportions of  
 385 shared variations between rye and those in AD, BD or AB from AVs<sup>before R</sup>,  
 386 respectively, then we have  $p_{ADR}=\gamma_1\omega p_{AV(AD)}$ ,  $p_{BDR}=\gamma_2\omega p_{AV(BD)}$  and  $p_{ABR}=\gamma_3\omega p_{AV(AB)}$ .  
 387 Here,  $\gamma_1, \gamma_2$  and  $\gamma_3$  are determined by the genomic relatedness between rye and the  
 388 three diploid lineages of wheat. As discussed earlier,  $\gamma_1, \gamma_2$  and  $\gamma_3$  should be very  
 389 close to each other. We therefore assumed that  $\gamma_1 = \gamma_2 = \gamma_3 = \gamma$ , and that the  
 390 distribution of AVs could therefore be estimated from the identified AVs (i.e.,  
 391  $p_{ADR}:p_{BDR}:p_{ABR} = p_{AV(AD)}:p_{AV(BD)}:p_{AV(AB)}$ ).

392

### 393 **Method 1: Detecting PIV signals from shared variations**

394 As the proportions of inherited variations from AV<sup>before R</sup> between rye and those in AD,  
 395 BD or AB types are similar, we have

$$396 \quad \frac{p_{ABR}}{p_{AV(AB)}} = \frac{p_{ADR}}{p_{AV(AD)}} = \frac{p_{BDR}}{p_{AV(BD)}} = \omega\gamma$$

397 As all shared variations in AB should originate from AVs in our models, we have  
 398  $p_{PIV(AB)} = 0$  and  $p_{AB} = p_{AV(AB)}$ . Thus,  $\frac{p_{ABR}}{p_{AB}} = \frac{p_{ABR}}{p_{AV(AB)}} = \omega\gamma$ . If AD or BD shared  
 399 variations include PIVs ( $p_{PIV(AD)} > 0$  or  $p_{PIV(BD)} > 0$ ),  $\frac{p_{ADR}}{p_{AD}}$  or  $\frac{p_{BDR}}{p_{BD}}$  will be less  
 400 than  $\frac{p_{ABR}}{p_{AB}}$ . We thus tested the two hypotheses to detect PIV signals from the shared  
 401 variations in AD and BD, respectively.

#### 402 *PIV signals in AD*

403 The hypothesis test here is  $H_0: p_{PIV(AD)} = 0$  versus  $H_1: p_{PIV(AD)} > 0$ .

404 The hypothesis  $p_{PIV(AD)} = 0$  is equivalent to  $\frac{p_{ADR}}{p_{AD}} = \frac{p_{ABR}}{p_{AB}}$ , and columns (AD and AB)  
 405 and rows (present in R and absent in R) are independent, as in the analysis of a  
 406 contingency table. Rejection of  $H_0$  indicates that  $\frac{p_{ADR}}{p_{AD}}$  is less likely than  $\frac{p_{ABR}}{p_{AB}}$ , i.e.,  
 407 there is a significant number of PIV signals in AD.

408 *PIV signals in BD*

409 The hypothesis test is  $H_0: p_{PIV(BD)} = 0$  versus  $H_1: p_{PIV(BD)} > 0$ . The hypothesis

410  $p_{PIV(BD)} = 0$  is equivalent to  $\frac{p_{BDR}}{p_{BD}} = \frac{p_{ABR}}{p_{AB}}$ . Rejection of  $H_0$  indicates  $\frac{p_{BDR}}{p_{BD}}$  is less likely

411 than  $\frac{p_{ABR}}{p_{AB}}$ , i.e., there is a significant number of PIV signals in BD.

412 Here,  $\frac{p_{ABR}}{p_{AB}}$ ,  $\frac{p_{ADR}}{p_{AD}}$  and  $\frac{p_{BDR}}{p_{BD}}$  could be estimated from the observed values of

413  $\frac{N_{ABR}}{N_{AB}}$ ,  $\frac{N_{ADR}}{N_{AD}}$  and  $\frac{N_{BDR}}{N_{BD}}$ , respectively. The differences among  $\frac{N_{ABR}}{N_{AB}}$ ,  $\frac{N_{ADR}}{N_{AD}}$  and  $\frac{N_{BDR}}{N_{BD}}$  were

414 compared using a four-fold table with chi-squared tests.

415 In summary, if significant PIV signals are detected in the AD type but not in the BD

416 type, then the non-HHS model B(A,D) should be accepted. On the other hand, if

417 significant PIV signals are detected in both the AD and BD types, then the HHS

418 model A(D)B should be accepted.

419

420 **Method 2: Differentiating the HHS- and non-HHS models based on the**

421 **discrepancy between observed and expected ratios of shared variations**

422 Using the R genome as an outgroup, we can divide the original data into AVs and

423 mixed variations which contain both AVs and PIVs. We can express their

424 distributions (original data, AVs and mixed variations) in the AB, AD and BD types as

425  $y_{AB} = \beta_{AB}x + \alpha_{AB}$ ,  $y_{AD} = \beta_{AD}x + \alpha_{AD}$  and  $y_{BD} = \beta_{BD}x + \alpha_{BD}$ , respectively, where

426  $\alpha_{AB}$ ,  $\alpha_{AD}$  and  $\alpha_{BD}$  are the proportions of the PIVs among the shared variations in

427 the AB, AD and BD types. We thus have  $\alpha_{AB} + \alpha_{AD} + \alpha_{BD} = 1$ ;  $x$  is the proportion

428 of AVs in the shared variations. Note that  $\beta$ s are fixed rate parameters: A negative

429 value suggests that the proportion of the shared variations ( $y$ ) will increase gradually

430 with decreasing  $x$  (when removing AVs based on the presence or absence of a given

431 variation in the outgroup). Here,  $y_{AB}$ ,  $y_{AD}$  and  $y_{BD}$  vary as  $x$  changes, while

432 keeping  $y_{AB} + y_{AD} + y_{BD} = 1$ . In the original data, we have  $x = x_0 = \frac{p_{AV}}{p_{AV} + p_{PIV}}$ ,

433 which is smaller than 1. In the mixed variations: Supposing  $\omega y$  is the proportion of



434 removed AVs, the value of  $x$  becomes  $x = x_1 = \frac{(1-\omega\gamma)p_{AV}}{(1-\omega\gamma)p_{AV}+p_{PIV}}$ , which is smaller  
435 than  $x_0$ . In the AV data, all shared variations are AVs; thus, the corresponding  $x$  is 1.

436 Under the non-HHS model B(A,D), the expected  $\alpha_{AD}$  should be close to 1. We  
437 therefore tested the hypothesis  $H_0: \alpha_{AD} = 1$  versus  $H_1: \alpha_{AD} \neq 1$ . Under the HHS  
438 model A(D)B, the expected  $\alpha_{AD} \simeq \alpha_{BD} \simeq 0.5$ , i.e., roughly equal contribution were  
439 expected from each of parental lineages to the D (Marcussen et al. 2010). We can  
440 therefore also test the hypothesis of  $H_0: \alpha_{AD} = \alpha_{BD} = 50\%$ . The test statistic was  
441 constructed based on  $(\text{Observed}-\text{Expected})^2/\text{Expected}$  as in the analysis of  
442 contingency table (Agresti 2018), and the expected values were obtained by  
443 maximising the multinomial log-likelihood and incorporating the constraints under the  
444 null hypothesis.

445

446

## 447 **Acknowledgements**

448 The work was supported by the Commonwealth Scientific and Industrial Organization  
449 (CSIRO), Australia (Project code: R-10191-01). Y.J., Z.Y., X.Y. are grateful to the  
450 Sichuan Agricultural University and the China Scholarship Council for funding his visit  
451 to CSIRO. H.H. is grateful to Henan Institute of Science and Technology and CSC for  
452 supporting her visit to CSIRO. The authors are grateful to Dr. Donald Gardiner for his  
453 constructive suggestions during the preparation of the manuscript.

454

## 455 **References**

- 456 Abbott R, Albach D, Ansell S, Arntzen JW, Baird SJ, Bierne N, Boughman J, Brelsford A,  
457 Buerkle CA, Buggs R, et al. 2013. Hybridization and speciation. *Journal of Evolutionary*  
458 *Biology* 26:229-246.
- 459 Agresti A. 2018. *An introduction to categorical data analysis*. New York: John Wiley and  
460 Sons.
- 461 Ashkenazy H, Cohen O, Pupko T, Huchon D. 2014. Indel reliability in indel-based  
462 phylogenetic inference. *Genome Biology and Evolution* 6:3199-3209.
- 463 Barb JG, Bowers JE, Renaut S, Rey JI, Knapp SJ, Rieseberg LH, Burke JM. 2014.  
464 Chromosomal evolution and patterns of introgression in *Helianthus*. *Genetics* 197:969-  
465 979.
- 466 Bauer E, Schmutzer T, Barilar I, Mascher M, Gundlach H, Martis MM, Twardziok SO,  
467 Hackauf B, Gordillo A, Wilde P, et al. 2017. Towards a whole - genome sequence for  
468 rye (*Secale cereale* L.). *The Plant Journal* 89:853-869.
- 469 Buerkle CA, Rieseberg LH. 2008. The rate of genome stabilization in homoploid hybrid  
470 species. *Evolution* 62:266-275.
- 471 Charlesworth D. 2010. Don't forget the ancestral polymorphisms. *Heredity* 105:509-510.
- 472 Devos KM, Dubcovsky J, Dvořák J, Chinoy CN, Gale MD. 1995. Structural evolution of  
473 wheat chromosomes 4A, 5A, and 7B and its impact on recombination. *Theoretical and*  
474 *Applied Genetics* 91:282-288.

- 475 Durand EY, Patterson N, Reich D, Slatkin M. Testing for ancient admixture between closely  
476 related populations. *Molecular Biology and Evolution* 28:2239-2252.
- 477 Dvořák J, Terlizzi PD, Zhang HB, Resta P. 1993. The evolution of polyploid wheats:  
478 identification of the A genome donor species. *Genome* 36:21-31.
- 479 Dvorak J, Zhang HB. 1990. Variation in repeated nucleotide sequences sheds light on the  
480 phylogeny of the wheat B and G genomes. *Proceedings of the National Academy of*  
481 *Sciences* 87:9640-9644.
- 482 El Baidouri M, Murat F, Veyssiere M, Molinier M, Flores R, Burlot L, Alaux M, Quesneville  
483 H, Pont C, Salse J. 2017. Reconciling the evolutionary origin of bread wheat (*Triticum*  
484 *aestivum*). *New Phytologist* 213:1477-1486.
- 485 Eriksson A, Manica A. 2012. Effect of ancient population structure on the degree of  
486 polymorphism shared between modern human populations and ancient hominins.  
487 *Proceedings of the National Academy of Sciences* 109:13956-13960.
- 488 Eriksson A, Manica A. 2014. The doubly conditioned frequency spectrum does not  
489 distinguish between ancient population structure and hybridization. *Molecular Biology*  
490 *and Evolution* 31:1618-1621.
- 491 Glemin S, Scornavacca C, Dainat J, Burgarella C, Viader V, Ardisson M, Sarah G, Santoni  
492 S, David J, Ranwez V. 2018. Pervasive hybridizations in the history of wheat relatives.  
493 *bioRxiv* 1:300848.
- 494 Gornicki P, Zhu H, Wang J, Challa GS, Zhang Z, Gill BS, Li W. The chloroplast view of the  
495 evolution of polyploid wheat. *New Phytologist* 204:704-714.
- 496 Huang S, Sirikhachornkit A, Su X, Faris J, Gill B, Haselkorn R, Gornicki P. 2002. Genes  
497 encoding plastid acetyl-CoA carboxylase and 3-phosphoglycerate kinase of the  
498 *Triticum/Aegilops* complex and the evolutionary history of polyploid wheat. *Proceedings*  
499 *of the National Academy of Sciences* 99:8133-8138.
- 500 Hudson RR. 1983. Testing the constant-rate neutral allele model with protein sequence  
501 data. *Evolution* 1:203-217.
- 502 Huson DH. 1998. SplitsTree: analyzing and visualizing evolutionary data. *Bioinformatics*  
503 14:68-73.

- 504 International Wheat Genome Sequencing Consortium. 2014. A chromosome-based draft  
505 sequence of the hexaploid bread wheat (*Triticum aestivum*) genome. *Science*  
506 345:1251788.
- 507 Jia J, Zhao S, Kong X, Li Y, Zhao G, He W, Appels R, Pfeifer M, Tao Y, Zhang X, et al.  
508 2013. *Aegilops tauschii* draft genome sequence reveals a gene repertoire for wheat  
509 adaptation. *Nature* 496:91-95.
- 510 Katoh K, Standley DM. MAFFT multiple sequence alignment software version 7:  
511 improvements in performance and usability. *Molecular Biology and Evolution* 30:772-  
512 780.
- 513 King IP, Purdie KA, Liu CJ, Reader SM, Pittaway TS, Orford SE, Miller TE. 1994. Detection  
514 of interchromosomal translocations within the *Triticeae* by RFLP analysis. *Genome*.  
515 37:882-887.
- 516 Kuritzin A, Kischka T, Schmitz J, Churakov G. Incomplete lineage sorting and hybridization  
517 statistics for large-scale retroposon insertion data. *PLoS Computational Biology*  
518 12:e1004812.
- 519 Li LF, Liu B, Olsen KM, Wendel JF. 2015a. A re-evaluation of the homoploid hybrid origin  
520 of *Aegilops tauschii*, the donor of the wheat D-subgenome. *New Phytologist* 208:4-8.
- 521 Li LF, Liu B, Olsen KM, Wendel JF. 2015b. Multiple rounds of ancient and recent  
522 hybridizations have occurred within the *Aegilops–Triticum* complex. *New Phytologist*  
523 208:11-12.
- 524 Ling HQ, Zhao S, Liu D, Wang J, Sun H, Zhang C, Fan H, Li D, Dong L, Tao Y, et al. 2013.  
525 Draft genome of the wheat A-genome progenitor *Triticum urartu*. *Nature* 496:87-90.
- 526 Ma J, Stiller J, Berkman PJ, Wei Y, Rogers J, Feuillet C, Dolezel J, Mayer KF, Eversole K,  
527 Zheng YL, et al. 2013. Sequence-based analysis of translocations and inversions in  
528 bread wheat (*Triticum aestivum* L.). *PLoS One* 8:e79329.
- 529 Mallet J. 2007. Hybrid speciation. *Nature* 446:279-283.
- 530 Marcussen T, Sandve SR, Heier L, Spannagl M, Pfeifer M, Jakobsen KS, Wulff BB,  
531 Steuernagel B, Mayer KF, Olsen OA, et al. 2014. Ancient hybridizations among the  
532 ancestral genomes of bread wheat. *Science* 345:1250092.

- 533 Mascher M, Gundlach H, Himmelbach A, Beier S, Twardziok SO, Wicker T, Radchuk V,  
534 Dockter C, Hedley PE, Russell J, et al. 2017. A chromosome conformation capture  
535 ordered sequence of the barley genome. *Nature* 544:427-433.
- 536 McFadden ES, Sears ER. 1946. The origin of *Triticum spelta* and its free-threshing  
537 hexaploid relatives. *Journal of Heredity* 37:81-89.
- 538 Page AJ, Taylor B, Delaney AJ, Soares J, Seemann T, Keane JA, Harris SR. 2016. SNP-  
539 sites: rapid efficient extraction of SNPs from multi-FASTA alignments. *Microbial*  
540 *Genomics* 2:e000056.
- 541 Payseur BA, Rieseberg LH. 2016. A genomic perspective on hybridization and speciation.  
542 *Molecular Ecology* 25:2337-2360.
- 543 Sandve SR, Marcussen T, Mayer K, Jakobsen KS, Heier L, Steuernagel B, Wulff BB, Olsen  
544 OA. 2015. Chloroplast phylogeny of *Triticum/Aegilops* species is not incongruent with  
545 an ancient homoploid hybrid origin of the ancestor of the bread wheat D-genome. *New*  
546 *Phytologist* 208:9-10.
- 547 Sankararaman S, Patterson N, Li H, Pääbo S, Reich D. 2012. The date of interbreeding  
548 between Neandertals and modern humans. *PLoS Genetics* 8:e1002947.
- 549 Schumer M, Rosenthal GG, Andolfatto P. 2014. How common is homoploid hybrid  
550 speciation? *Evolution* 68:1553-1560.
- 551 Slatkin M, Pollack JL. 2008. Subdivision in an ancestral species creates asymmetry in gene  
552 trees. *Molecular Biology and Evolution* 25:2241-2246.
- 553 Sousa V, Hey J. 2013. Understanding the origin of species with genome-scale data:  
554 modelling gene flow. *Nature Reviews Genetics* 14:404-414.
- 555 Stamatakis A. 2014. RAxML version 8: a tool for phylogenetic analysis and post-analysis  
556 of large phylogenies. *Bioinformatics* 30:1312-1313.
- 557 Tabari E, Su Z. 2017. PorthoMCL: parallel orthology prediction using MCL for the realm of  
558 massive genome availability. *Big Data Analytics* 2:4.
- 559 Tajima F. 1983. Evolutionary relationship of DNA sequences in finite populations. *Genetics*  
560 105:437-460.
- 561 Taylor SA, Larson EL. 2019. Insights from genomes into the evolutionary importance and

562 prevalence of hybridization in nature. *Nature Ecology and Evolution* 3:170-177.

563 Theunert C, Slatkin M. 2017. Distinguishing recent admixture from ancestral population  
564 structure. *Genome Biology and Evolution*. 9:427-437.

565 Ungerer MC, Baird SJ, Pan J, Rieseberg LH. 1998. Rapid hybrid speciation in wild  
566 sunflowers. *Proceedings of the National Academy of Sciences* 95:11757-11762.

567 Yang MA, Malaspinas AS, Durand EY, Slatkin M. 2012. Ancient structure in Africa unlikely  
568 to explain Neanderthal and non-African genetic similarity. *Molecular Biology and*  
569 *Evolution* 29:2987-2995.

570

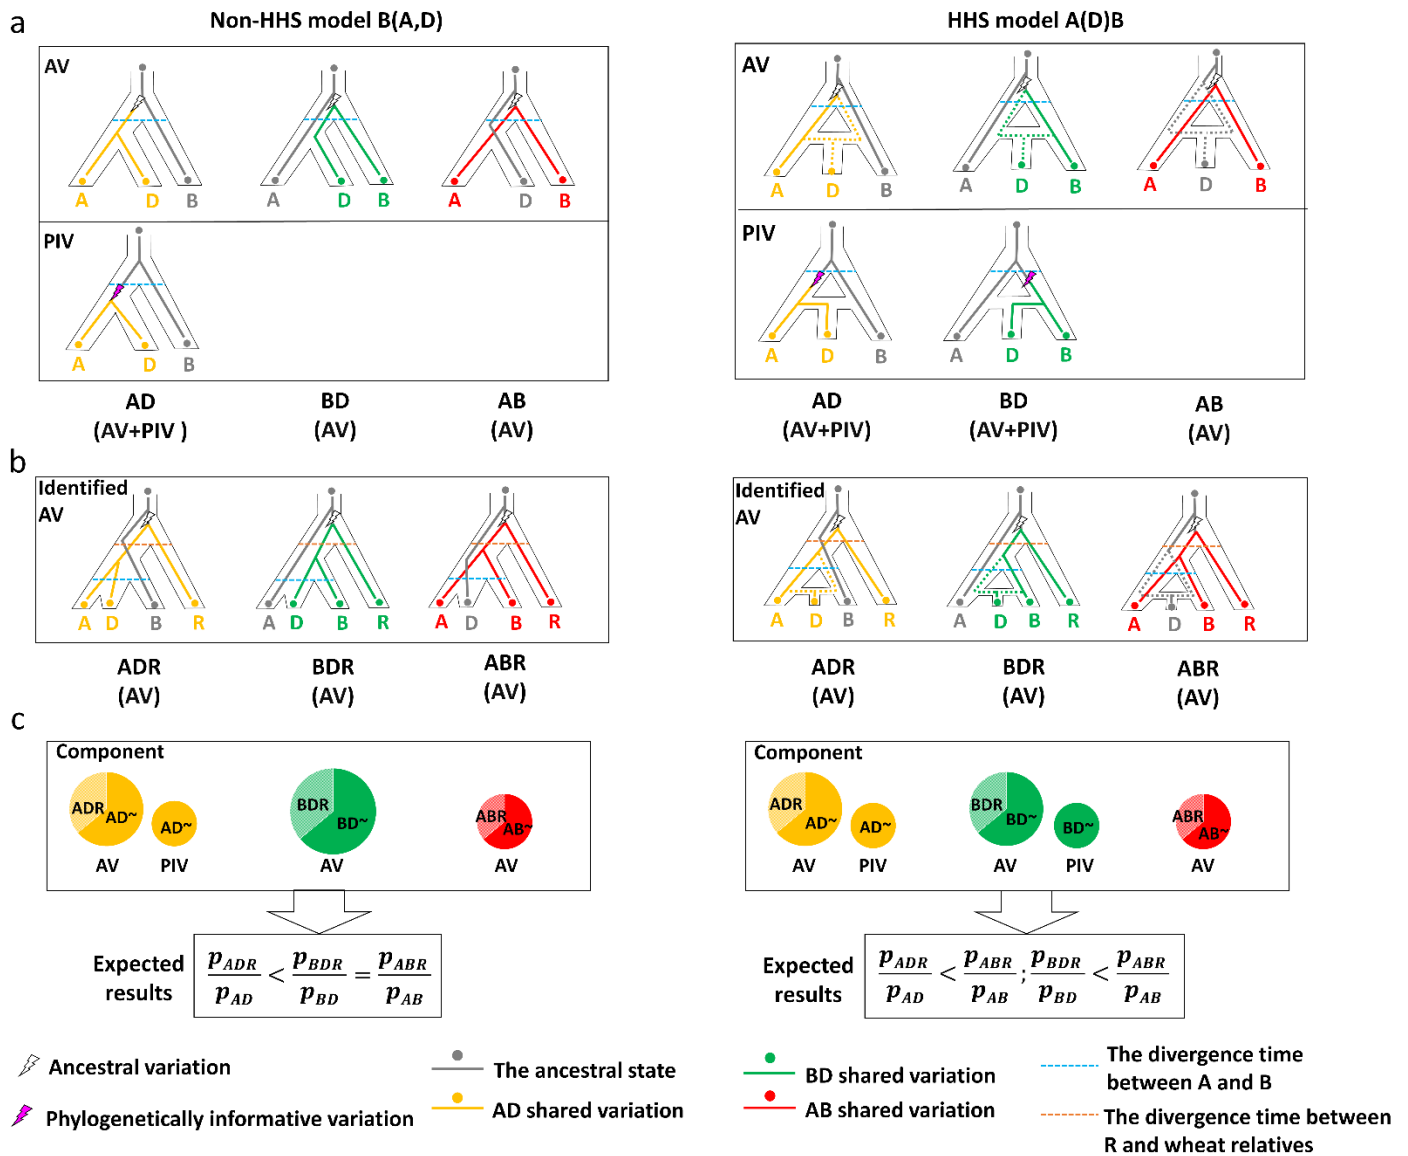

572 **Figure 1. Difference in the inheritance patterns of shared variations**  
 573 **between the HHS and non-HHS models for the speciation of the diploid**  
 574 **D lineage in wheat.** (A) Possible paths for the inheritance of ancestral  
 575 variations (AVs) and phylogenetically informative variations (PIVs) for the  
 576 models of non-HHS (left) or a single HH event (right). Dotted lines (grey,  
 577 yellow and green) indicate possible paths of inherited variations. (B) AVs  
 578 identified from the shared paths using rye (R) as the outgroup. (C) Difference  
 579 in the expected results between the B(A,D) and A(D)B models. The probability  
 580 ( $p$ ) can be estimated from observed results from the shared variations.

581

582

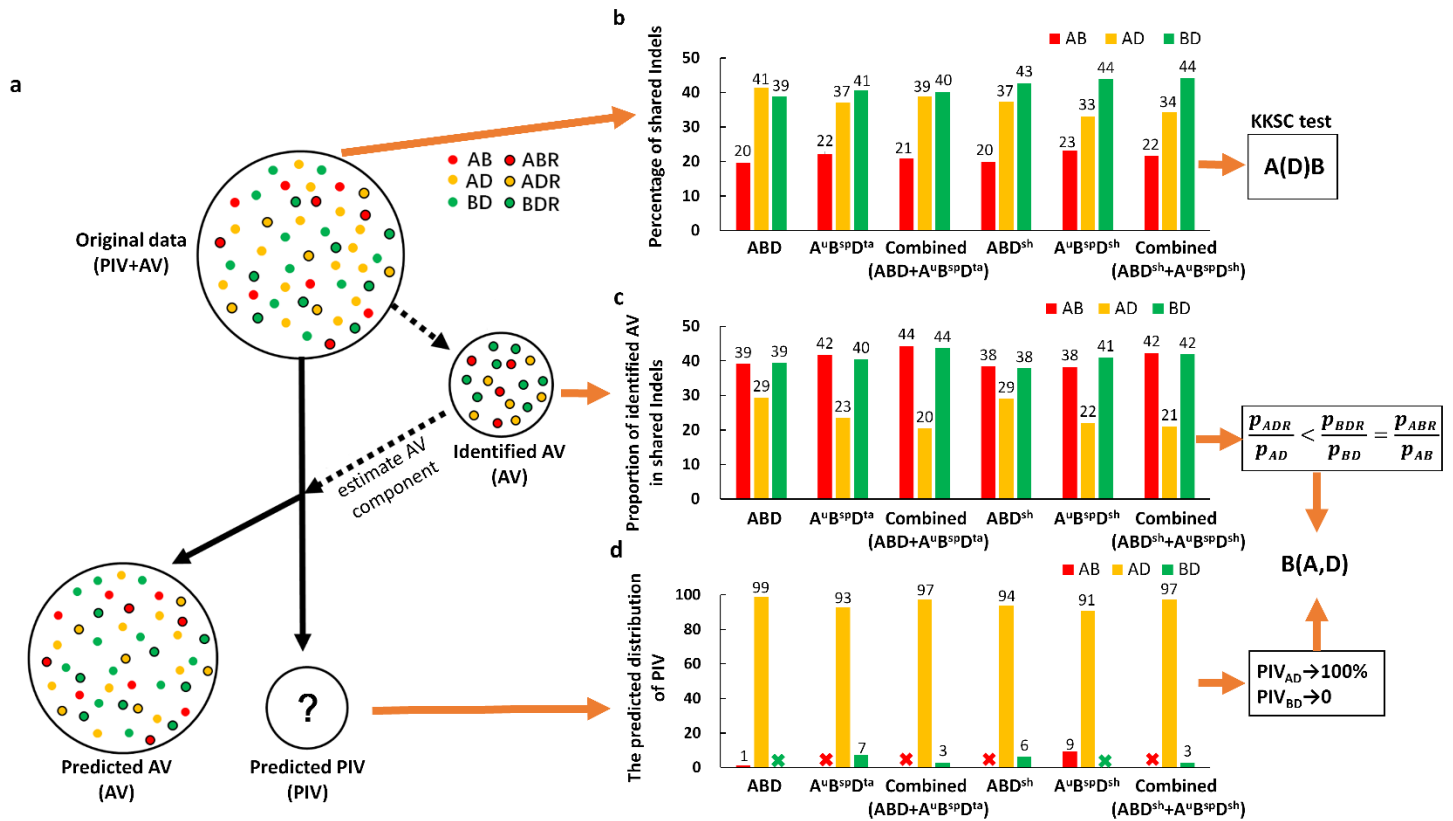

584 **Figure 2. Phylogenetic relationships among the diploid lineages of A, B**  
 585 **and D in wheat inferred from shared variations.** Analyses were conducted  
 586 on six data sets from the different combinations of the three lineages: A  
 587 lineage including A subgenome (A) and *T. uratu* (A<sup>u</sup>); B lineage including B  
 588 subgenome (B) and *Ae. speltoides* (B<sup>sp</sup>); D lineage including D subgenome  
 589 (D), *Ae. tauschii* (D<sup>ta</sup>) and *Ae. Sharonensis* (D<sup>sh</sup>). (A) An illustration of the  
 590 approach used to indirectly detect PIVs from the original data. (B)  
 591 Percentages of shared variations (Indels) in AB (red bars), AD (yellow bars)  
 592 and BD (green bars) based on the original data. KKSC insertion significance  
 593 test (Kuritzin et al. 2016) support the A(D)B model (supplementary table 3).  
 594 (C) The proportion of AVs identified from the shared Indels. The values of AB  
 595 (red bars), AD (yellow bars) and BD (green bars) were calculated based on  
 596 the numbers of shared Indels in ABR/AB, ADR/AD and BDR/BD, respectively.  
 597 The Chi-squared test against these data supported  $\frac{p_{ADR}}{p_{AD}} < \frac{p_{ABR}}{p_{AB}} = \frac{p_{BDR}}{p_{BD}}$   
 598 (supplementary table 4). (D) Percentages of shared variation between AB, AD



599 and BD after removing the estimated components of AVs. The majority of AVs  
 600 could be removed from the original data based on their distributions until one  
 601 of the three shared types reached zero (the symbol of “x”).

602

603

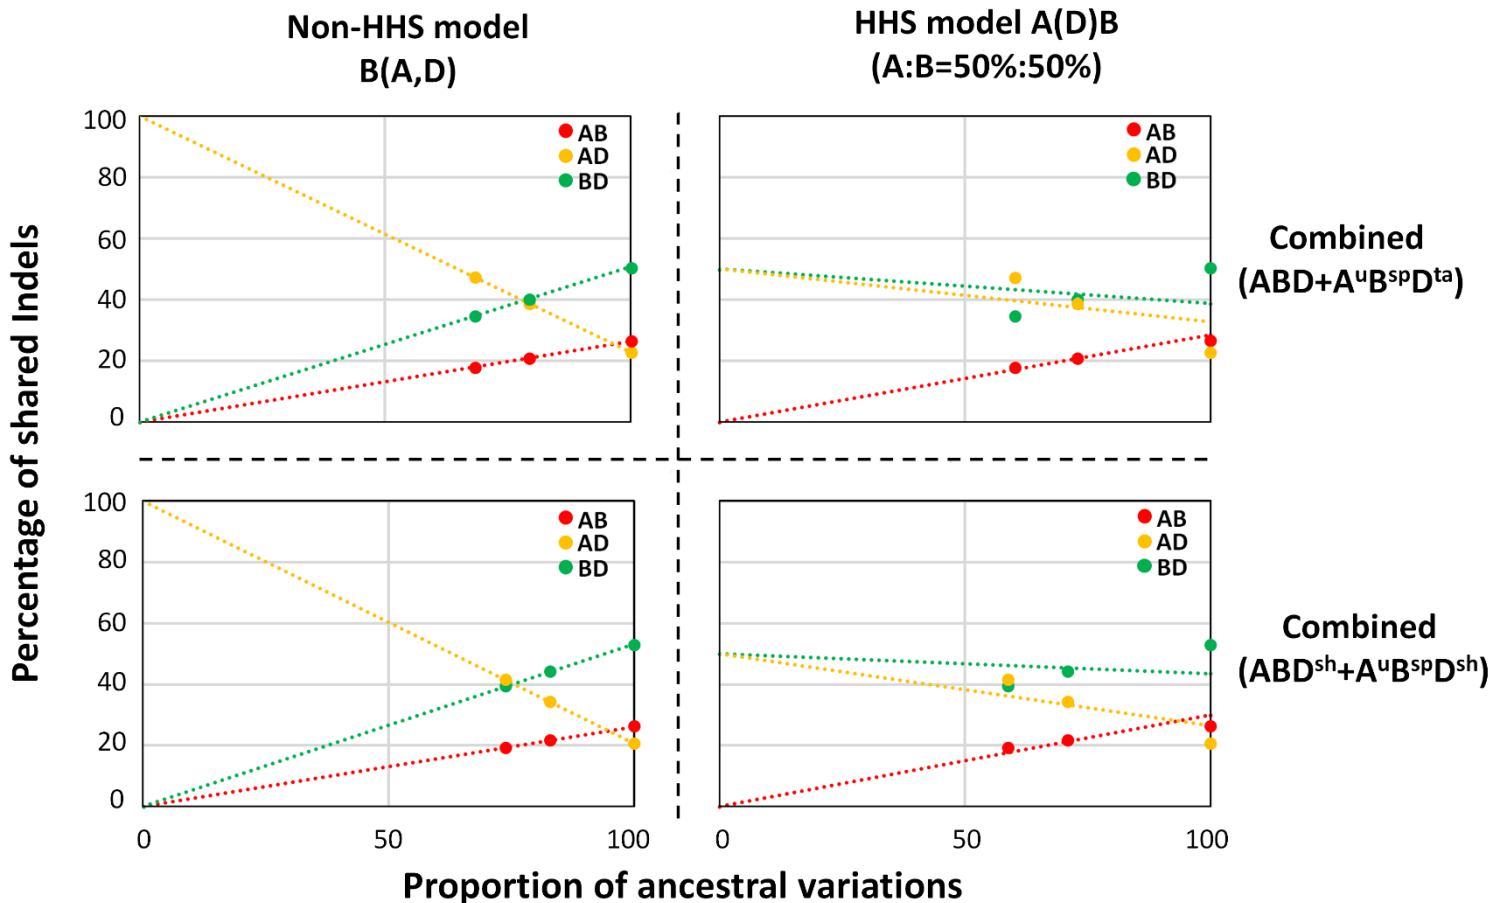

605 **Figure 3. Fitness comparison between the HHS and non-HHS models**  
 606 **based on expected and detected ratios of shared variations.** Two  
 607 combined data sets were used to assess the HHS model A(D)B (with equal  
 608 contributions) (Marcussen et al. 2014) and the non-HHS model B(A,D). The  
 609 dots show the detected results from the shared variations (supplementary  
 610 table 2), and the dotted lines the expected results based on either of the  
 611 models.

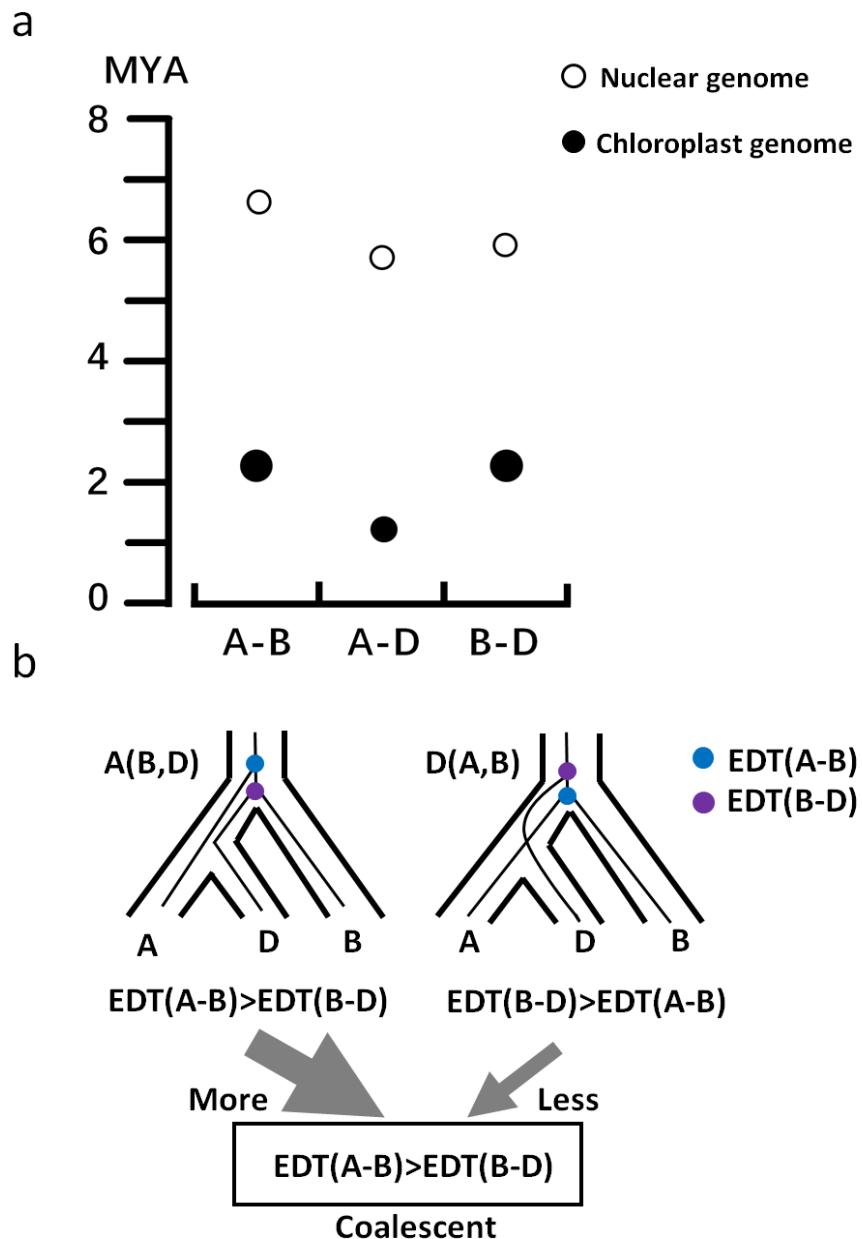

612

613 **Figure 4. Estimated divergence times (EDTs) under the influence of**  
 614 **ancestral variations (AVs).** (A) Difference in EDTs between the uses of  
 615 nuclear (Marcussen et al. 2014) and chloroplast (Gornicki et al. 2014)  
 616 sequences. Diameters of the dots indicate the confidence interval. (B)  
 617 Overestimation of divergence times due to AVs. The gene trees of D(A,B) and  
 618 A(B,D) originated from AVs likely resulted in overestimations of the coalescent  
 619 EDT of the three lineages. Since the proportion of A(B,D) is much larger than  
 620 that of D(A,B), the coalescent EDT(A-B) would likely be more significantly  
 621 overestimated in comparison to the coalescent EDT(B-D).

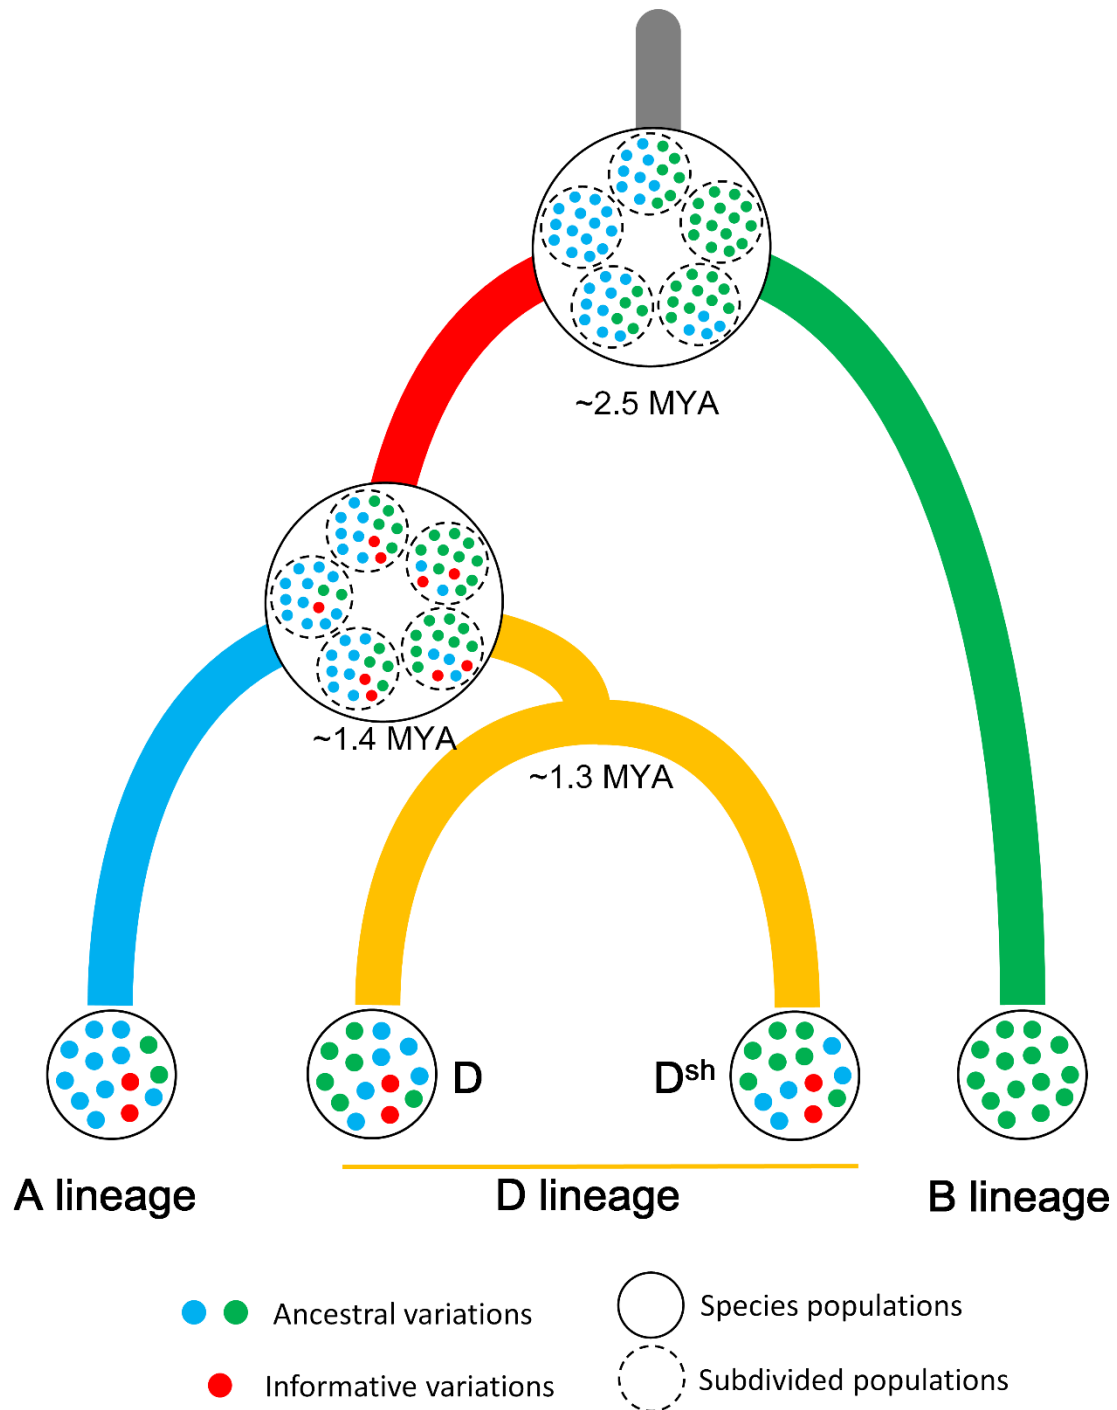

627 Table 1. The statistical test for the non-HHS model B(A,D)

| Data set <sup>a</sup>                                                         | Proportion of AVs in shared Indels | Predicted distribution of AVs |       |       | Proportion of PIVs (only AD) in shared Indels | Significant test (p-value) <sup>b</sup> |
|-------------------------------------------------------------------------------|------------------------------------|-------------------------------|-------|-------|-----------------------------------------------|-----------------------------------------|
|                                                                               |                                    | AB                            | AD    | BD    |                                               |                                         |
| ABD                                                                           | 89.6%                              | 22.0%                         | 34.5% | 43.4% | 10.4%                                         | 0.951                                   |
| A <sup>u</sup> B <sup>sp</sup> D <sup>ta</sup>                                | 84.2%                              | 26.4%                         | 25.3% | 48.3% | 15.8%                                         | 0.821                                   |
| Combined (ABD+A <sup>u</sup> B <sup>sp</sup> D <sup>ta</sup> )                | 79.2%                              | 26.4%                         | 22.8% | 50.8% | 20.8%                                         | 0.905                                   |
| ABD <sup>sh</sup>                                                             | 91.2%                              | 21.9%                         | 31.2% | 46.9% | 8.8%                                          | 0.912                                   |
| A <sup>u</sup> B <sup>sp</sup> D <sup>sh</sup>                                | 85.2%                              | 27.1%                         | 21.4% | 51.5% | 14.8%                                         | 0.581                                   |
| Combined (ABD <sup>sh</sup> +A <sup>u</sup> B <sup>sp</sup> D <sup>sh</sup> ) | 82.9%                              | 26.1%                         | 20.7% | 53.3% | 17.1%                                         | 0.931                                   |

628 <sup>a</sup> A lineage including A subgenome (A) and *T. uratu* (A<sup>u</sup>); B lineage including B subgenome  
629 (B) and *A. speltooides* (B<sup>sp</sup>); D lineage including D subgenome(D), *A. tauschii* (D<sup>ta</sup>) and *A.*  
630 *sharonensis*(D<sup>sh</sup>).

631 <sup>b</sup> The null hypothesis is based on the non-HHS model B(A,D). That the p-values for none of  
632 the combinations are significant indicates that there is no evidence against the model.

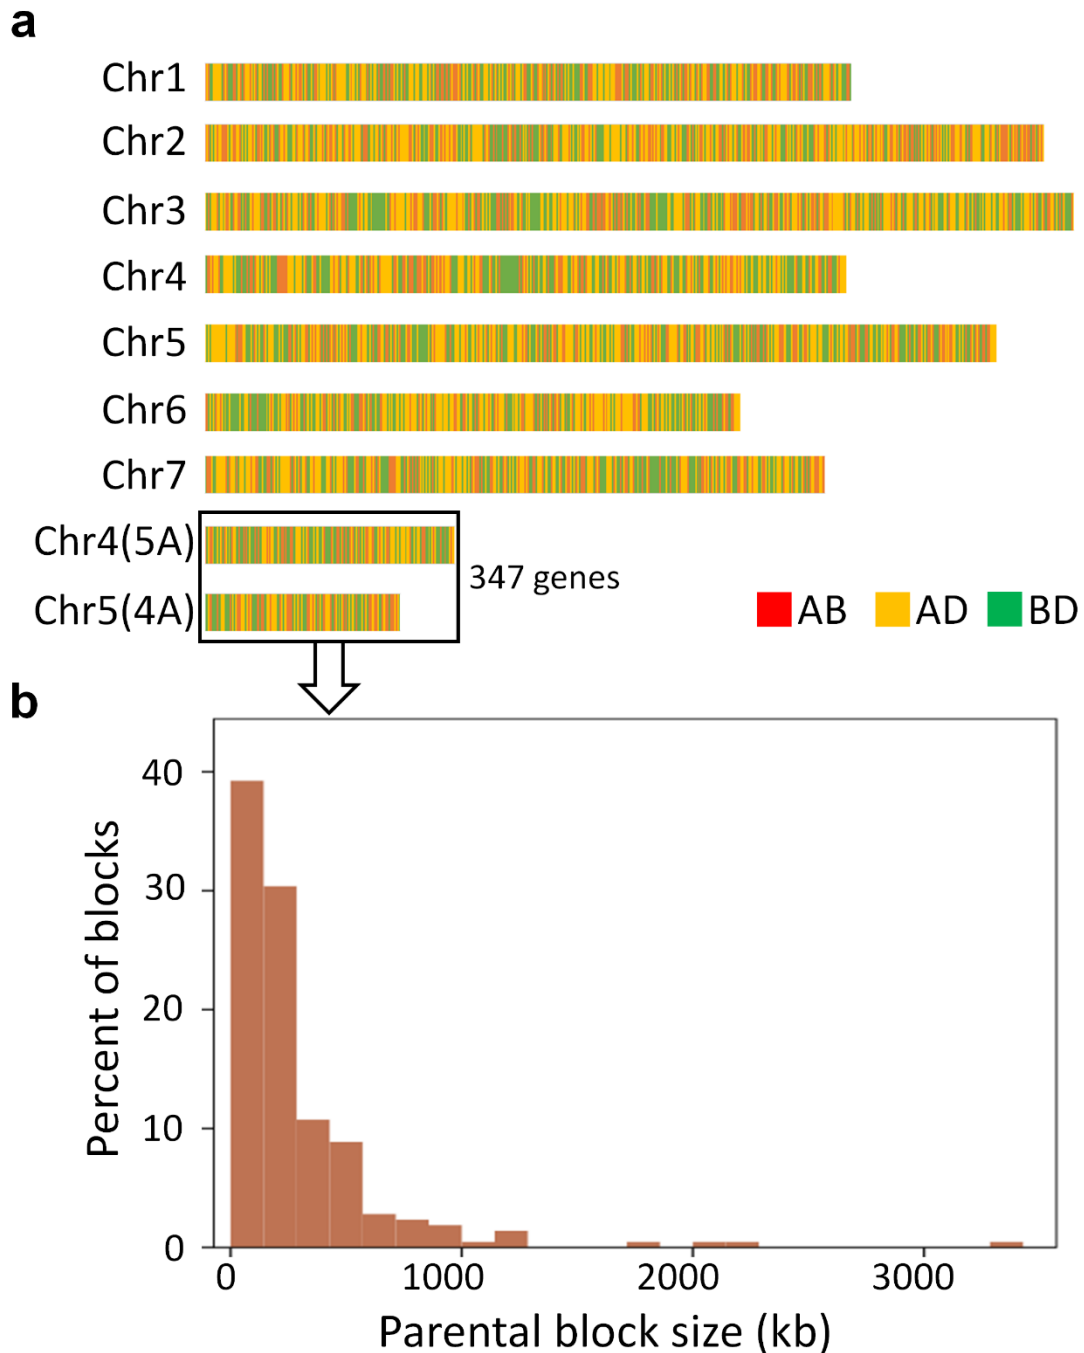

633

634 **Supplementary Figure 1. Distributions of parental gene blocks for the**

635 **three subgenomes of bread wheat based on gene trees. (a) RAxML**

636 results based on the use of 3,771 genes on the seven chromosomes and 347

637 genes on the segments related to the 4AL/5AL translocation. AB, AD and BD

638 represent the gene trees of D(A,B), B(A,D) and A(B,D), respectively. They

639 were ordered according to the physical map of the D subgenome. (b) Size

640 distribution of parental blocks in the two regions involved in the relative  
641 4AL/5AL translocation.  
642

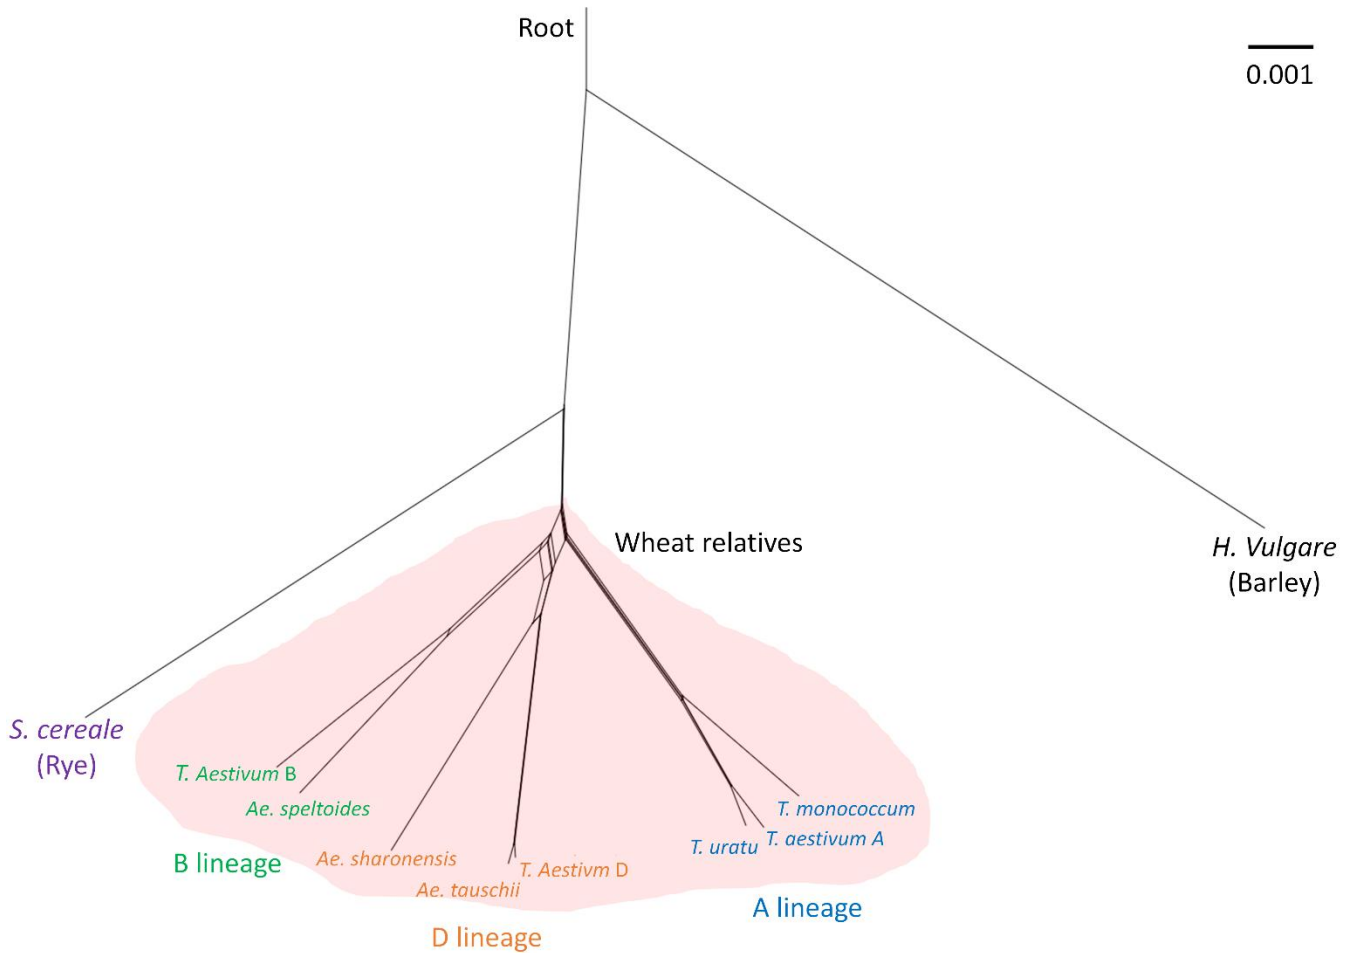

644 **Supplementary Figure 2. The rooted phylogenetic network constructed**  
645 **from the RAxML results based on the analysis of split networks using**  
646 **the 192 orthologous genes.** It shows clearly that rye diverged earlier than  
647 the three diploid lineages of bread wheat and no gene flow occurred between  
648 them after the divergence of the A, B and D lineages.

649  
650

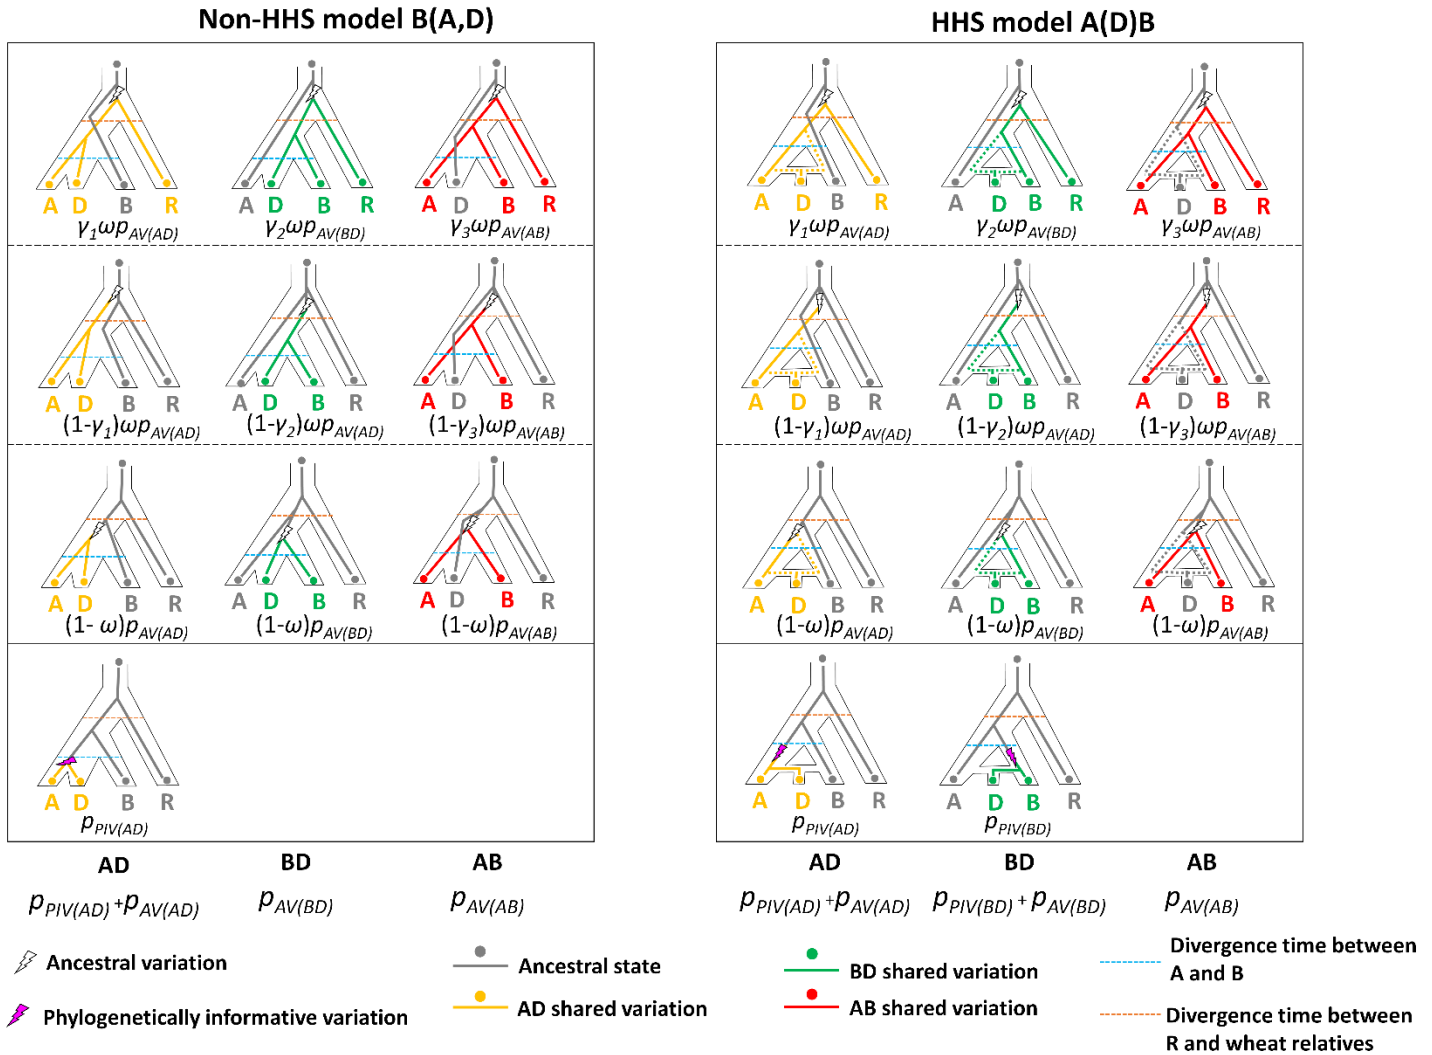

652 **Supplementary Figure 3. Difference in the probability of shared**  
 653 **variations between the HHS and non-HHS models when rye is used as**  
 654 **the outgroup.** The probability of ancestral variations in shared variations is  
 655 represented as  $p_{AV}$  and it is equal to  $p_{AV(AD)} + p_{AV(BD)} + p_{AV(AB)}$ . Suppose  $\omega$  is the  
 656 proportion of AVs occurred prior to rye divergence, the probability of AVs before R  
 657 ( $AVs^{\text{before R}}$ ) is  $n p_{AV}$ . The probability of AD, BD and AB types derived from  $AVs^{\text{before R}}$   
 658 could be represented as  $\omega p_{AV(AD)}$ ,  $\omega p_{AV(BD)}$  and  $\omega p_{AV(AB)}$ , respectively. Suppose  
 659  $\gamma_1, \gamma_2$  and  $\gamma_3$  are the proportions of shared variations between rye and those in AD,  
 660 BD or AB from  $AVs^{\text{before R}}$ , respectively, we have  $p_{ADR} = \gamma_1 \omega p_{AV(AD)}$ ,  $p_{BDR} = \gamma_2 \omega p_{AV(BD)}$   
 661 and  $p_{ABR} = \gamma_3 \omega p_{AV(AB)}$ . As the R genome has a similar genomic relatedness to the  
 662 diploid A, B or D lineage (thus  $\gamma_1, \gamma_2$  and  $\gamma_3$  are approximately equal), we thus have  
 663  $p_{ADR} : p_{BDR} : p_{ABR} = p_{AV(AD)} : p_{AV(BD)} : p_{AV(AB)}$ .

664

665



666 Supplementary Table 1. The genomic relatedness between rye and each of the three  
667 subgenomes of bread wheat inferred from the shared SNPs in 1,614 orthologous  
668 genes<sup>a</sup>

| Data set <sup>b</sup> | Number of SNPs | Shared SNPs |          |          | Genomic relatedness <sup>c</sup> |
|-----------------------|----------------|-------------|----------|----------|----------------------------------|
| A/B/R                 | 20530          | AB:70.5%    | AR:14.7% | BR:14.8% | AB>>AR≈BR                        |
| A/D/R                 | 21044          | AD:74.5%    | AR:12.9% | DR:12.5% | AD>>AR≈DR                        |
| B/D/R                 | 20566          | BD:73.8%    | BR:13.3% | DR:12.9% | BD>>BR≈DR                        |
| A/B/D                 | 12170          | AB:26.7%    | AD:38.9% | BD:34.4% | AD>BD>AB                         |

669 <sup>a</sup>The orthologous genes were identified from CDS of the three subgenomes of bread wheat,  
670 rye and barley (Supplementary data 4).

671 <sup>b</sup>The barley (Morex) genome was used as the outgroup to infer the ancestral status of a  
672 given variation;

673 <sup>c</sup>The results indicated that the rye genome shares a similar genetic relatedness with A, B or D  
674 subgenome of bread wheat.

675 Supplementary Table 2. The distribution of shared Indels in the six different data sets

| Data set <sup>a</sup>                                                           | Number of Indels | Original |     |     | AVs        |     |     |     | Remainder (mixture) |     |     |     |  |
|---------------------------------------------------------------------------------|------------------|----------|-----|-----|------------|-----|-----|-----|---------------------|-----|-----|-----|--|
|                                                                                 |                  | AB       | AD  | BD  | Proportion | ABR | ADR | BDR | Proportion          | AB~ | AD~ | BD~ |  |
| ABD                                                                             | 881              | 174      | 364 | 343 | 35.2%      | 68  | 107 | 135 | 64.8%               | 106 | 257 | 208 |  |
| A <sup>u</sup> B <sup>sp</sup> D <sup>ta</sup>                                  | 711              | 158      | 264 | 289 | 34.5%      | 66  | 62  | 117 | 65.5%               | 92  | 202 | 172 |  |
| Combined<br>(ABD+A <sup>u</sup> B <sup>sp</sup> D <sup>ta</sup> )               | 592              | 124      | 230 | 238 | 34.8%      | 55  | 47  | 104 | 65.2%               | 69  | 183 | 134 |  |
| ABD <sup>sh</sup>                                                               | 730              | 146      | 272 | 312 | 34.7%      | 56  | 79  | 118 | 65.3%               | 90  | 193 | 194 |  |
| A <sup>u</sup> B <sup>sp</sup> D <sup>sh</sup>                                  | 645              | 149      | 213 | 283 | 34.1%      | 57  | 47  | 116 | 65.9%               | 92  | 166 | 167 |  |
| Combined<br>(ABD <sup>sh</sup> +A <sup>u</sup> B <sup>s</sup> D <sup>sh</sup> ) | 514              | 111      | 176 | 227 | 34.8%      | 47  | 37  | 95  | 65.2%               | 64  | 139 | 132 |  |

676 <sup>a</sup> A lineage including A subgenome (A) and *T. uratu* (A<sup>#</sup>); B lineage including B subgenome  
677 (B) and *A. speltoides* (S); and D lineage including the D subgenome (D), *Ae. tauschii* (D<sup>#</sup>) and  
678 *Ae. sharonensis*(S\*).

679 Supplementary Table 3. KKSC insertion significance test on the proposed  
 680 phylogenetic models based on shared Indels

| Data set <sup>a</sup>                                                            | HHS test<br>(p-value) | Tree test<br>(p-value) | Proposed model   |
|----------------------------------------------------------------------------------|-----------------------|------------------------|------------------|
| ABD                                                                              | 8.9851e-14            | 0.452                  | A(D)B            |
| A <sup>u</sup> B <sup>sp</sup> D <sup>ta</sup>                                   | 2.7876e-07            | 0.307                  | A(D)B            |
| Combined<br>(ABD+A <sup>u</sup> B <sup>sp</sup> D <sup>ta</sup> )                | 1.8919e-08            | 0.746                  | A(D)B            |
| ABD <sup>sh</sup>                                                                | 7.284e-10             | 0.107                  | A(D)B            |
| A <sup>u</sup> B <sup>sp</sup> D <sup>sh</sup>                                   | 0.001                 | 0.002                  | A(D)B and A(B,D) |
| Combined<br>(ABD <sup>sh</sup> +A <sup>u</sup> B <sup>sp</sup> D <sup>sh</sup> ) | 0.000                 | 0.013                  | A(D)B and A(B,D) |

681 <sup>a</sup> A lineage including A subgenome (A) and *T. uratu* (A<sup>u</sup>); B lineage including B subgenome  
 682 (B) and *Ae. speltoides* (B<sup>sp</sup>); D lineage including D subgenome(D), *Ae. tauschii* (D<sup>ta</sup>) and *Ae.*  
 683 *sharonensis*(D<sup>sh</sup>).

684 Supplementary Table 4. Significant test of PIV signals in AD and BD based on  
 685 shared Indels

| Data set <sup>a</sup>                                                            | Significant test (p-value) |       | Proposed model |
|----------------------------------------------------------------------------------|----------------------------|-------|----------------|
|                                                                                  | AD                         | BD    |                |
| ABD                                                                              | 0.025                      | 0.950 | B(A,D)         |
| A <sup>u</sup> B <sup>sp</sup> D <sup>ta</sup>                                   | 0.000                      | 0.791 | B(A,D)         |
| Combined<br>(ABD+A <sup>u</sup> B <sup>sp</sup> D <sup>ta</sup> )                | 0.000                      | 0.906 | B(A,D)         |
| ABD <sup>sh</sup>                                                                | 0.041                      | 0.830 | B(A,D)         |
| A <sup>u</sup> B <sup>sp</sup> D <sup>sh</sup>                                   | 0.001                      | 0.581 | B(A,D)         |
| Combined<br>(ABD <sup>sh</sup> +A <sup>u</sup> B <sup>sp</sup> D <sup>sh</sup> ) | 0.000                      | 0.933 | B(A,D)         |

686 <sup>a</sup> A lineage including A subgenome (A) and *T. uratu* (A<sup>u</sup>); B lineage including B subgenome  
 687 (B) and *A. speltooides* (B<sup>sp</sup>); D lineage including D subgenome (D), *A. tauschii* (D<sup>ta</sup>) and *A.*  
 688 *sharonensis* (D<sup>sh</sup>).

689 Supplementary Table 5. The statistical test for the HHS-model A(B)D  
 690 (A:B=50%:50%).

| Data set <sup>a</sup>                                                            | Proportion of AVs in shared Indels | Distribution of AVs |       |       | Proportion of PIVs (AD:BD=50%:50%) in shared Indels | Significant test (p-value) <sup>b</sup> |
|----------------------------------------------------------------------------------|------------------------------------|---------------------|-------|-------|-----------------------------------------------------|-----------------------------------------|
|                                                                                  |                                    | AB                  | AD    | BD    |                                                     |                                         |
| ABD                                                                              | 89.0%                              | 22.0%               | 40.1% | 37.9% | 11.1%                                               | 0.041                                   |
| A <sup>u</sup> B <sup>sp</sup> D <sup>ta</sup>                                   | 77.9%                              | 28.4%               | 32.5% | 39.1% | 22.1%                                               | 0.003                                   |
| Combined<br>(ABD+A <sup>u</sup> B <sup>sp</sup> D <sup>ta</sup> )                | 72.8%                              | 28.5%               | 32.7% | 38.8% | 27.2%                                               | 0.000                                   |
| ABD <sup>sh</sup>                                                                | 87.1%                              | 22.9%               | 35.2% | 42.0% | 11.8%                                               | 0.129                                   |
| A <sup>u</sup> B <sup>sp</sup> D <sup>sh</sup>                                   | 77.8%                              | 29.4%               | 27.4% | 43.2% | 22.2%                                               | 0.002                                   |
| Combined<br>(ABD <sup>sh</sup> +A <sup>u</sup> B <sup>sp</sup> D <sup>sh</sup> ) | 70.9%                              | 30.0%               | 26.5% | 43.6% | 29.1%                                               | 0.004                                   |

691

692 <sup>a</sup> A lineage including A subgenome (A) and *T. uratu* (A<sup>u</sup>); B lineage including B subgenome  
 693 (B) and *Ae. speltoides* (B<sup>sp</sup>); D lineage including D subgenome(D), *Ae. tauschii* (D<sup>ta</sup>) and *Ae.*  
 694 *Sharonensis* (D<sup>sh</sup>).

695 <sup>b</sup>The predicted model A(D)B is the null hypothesis. The p-values are significant in almost all of  
 696 the combinations, indicating that there is strong evidence against this model.

697
